# Supplementary material
Source: PubMed Central journal article supplement (PMC5038228)
Supplement: supp_60.10.5627_aac00705-16_Supp_s1_seq11.pdf [file supp_60.10.5627_aac00705-16_Supp_s1_seq11.pdf]

## Supplemental Tables and Figure

**Table 1: Evolution of antibiotic resistance of 2 *Pseudomonas aeruginosa* strains**

| <b>Antimicrobial susceptibilities</b> | <b><i>Pseudomonas aeruginosa</i> #1<br/>(mucoïd strain) (Day 0)<br/>MIC (mg/ml)<br/>(Interpretation)</b> | <b><i>Pseudomonas aeruginosa</i> #1<br/>(mucoïd strain) (Day 15)<br/>MIC (mg/ml)<br/>(Interpretation)</b> | <b><i>Pseudomonas aeruginosa</i> #2<br/>(non-mucoïd strain) (Day 0)<br/>MIC (mg/ml)<br/>(Interpretation)</b> | <b><i>Pseudomonas aeruginosa</i> #2<br/>(non-mucoïd strain) (Day 15)<br/>MIC (mg/ml)<br/>(interpretation)</b> |
|---------------------------------------|----------------------------------------------------------------------------------------------------------|-----------------------------------------------------------------------------------------------------------|--------------------------------------------------------------------------------------------------------------|---------------------------------------------------------------------------------------------------------------|
| Amikacin                              | <8 (Sensitive)                                                                                           | 64 (Resistant)                                                                                            | 16 (Sensitive)                                                                                               | 32 (Intermediate)                                                                                             |
| Aztreonam                             | 0.5 (Sensitive)                                                                                          | 8 (Sensitive)                                                                                             | 16 (Intermediate)                                                                                            | 4 (Sensitive)                                                                                                 |
| Cefepime                              | 16 (Intermediate)                                                                                        | 32 (Resistant)                                                                                            | 4 (Sensitive)                                                                                                | 16 (Intermediate)                                                                                             |
| Ceftazidime                           | 4 (Sensitive)                                                                                            | 6 (Sensitive)                                                                                             | 8 (Sensitive)                                                                                                | 2 (Sensitive)                                                                                                 |
| Gentamicin                            | >8 (Resistant)                                                                                           | >32 (Resistant)                                                                                           | >8 (Resistant)                                                                                               | >256 (Resistant)                                                                                              |
| Meropenem                             | 0.125 (Sensitive)                                                                                        | >32 (Resistant)                                                                                           | 8 (Resistant)                                                                                                | >32 (Resistant)                                                                                               |
| Piperacil/Tazobactam                  | 2/4 (Sensitive)                                                                                          | 32 (Intermediate)                                                                                         | ≤2/4 (Sensitive)                                                                                             | 4 (Sensitive)                                                                                                 |
| Tobramycin                            | >1024 (Resistant)                                                                                        | >1024 (Resistant)                                                                                         | >8 (Resistant)                                                                                               | >1024 (Resistant)                                                                                             |
| Ciprofloxacin                         | <0.5 (Sensitive)                                                                                         | 2 (Intermediate)                                                                                          | <0.5 (Sensitive)                                                                                             | 2 (Intermediate)                                                                                              |
| Doripenem                             | Not done                                                                                                 | >32 (Resistant)                                                                                           | Not done                                                                                                     | >32 (Resistant)                                                                                               |
| Ceftolozane/tazobactam                | Not done                                                                                                 | 0.5 (Sensitive)                                                                                           | Not done                                                                                                     | 1 (Sensitive)                                                                                                 |

**Table 2.** Ceftolozane/Tazobactam Desensitization Protocol at Children's Hospital of Michigan

| <b>INFUSION TIME</b> | <b>DOSE</b> | <b>CUMULATIVE DOSE</b> |
|----------------------|-------------|------------------------|
| 15 minutes           | 0.15 mg     | 0.15 mg                |
| 15 minutes           | 0.30 mg     | 0.45 mg                |
| 15 minutes           | 0.60 mg     | 1.05 mg                |
| 15 minutes           | 1.2 mg      | 2.25 mg                |
| 15 minutes           | 2.5 mg      | 4.75 mg                |
| 15 minutes           | 5 mg        | 9.75 mg                |
| 15 minutes           | 10 mg       | 19.75 mg               |
| 15 minutes           | 20 mg       | 39.75 mg               |
| 20 minutes           | 40 mg       | 79.75 mg               |
| 20 minutes           | 80 mg       | 159.75 mg              |
| 30 minutes           | 150 mg      | 309.75 mg              |
| 30 minutes           | 200 mg      | 509.75 mg              |
| 60 minutes           | 400 mg      | 909.75 mg              |
| 60 minutes           | 600 mg      | 1509.75 mg             |

This constitute the first total dose of C/T infused over 6 hours.

Subsequent dose of C/T 8 hours later: 1500mg every 8 hours infused over one hour.

**Figure 1.**

**Timeline of Hospital Course, Treatment and Treatment Effect**

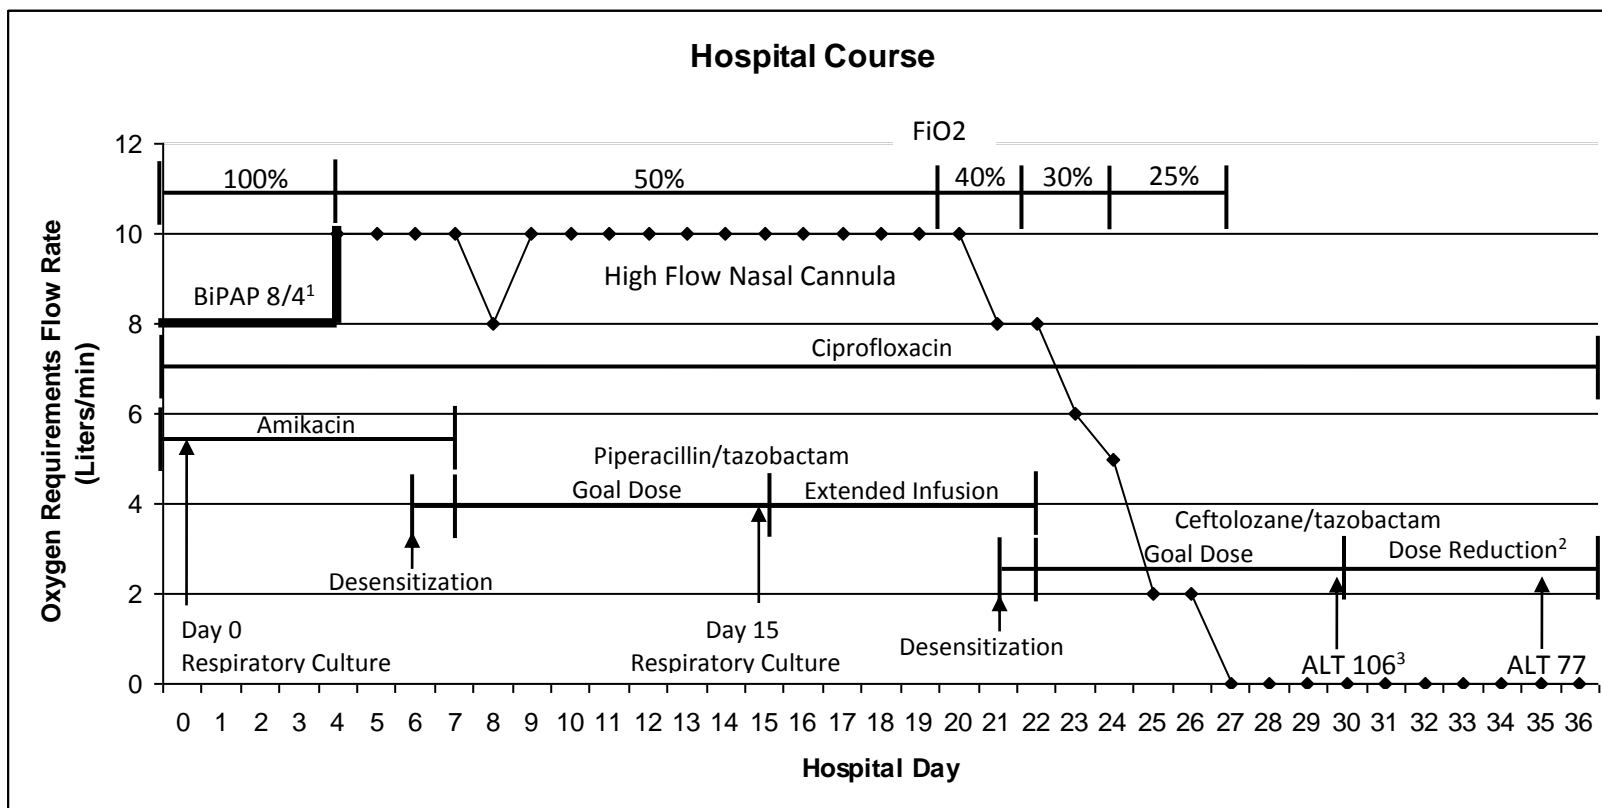

<sup>1</sup>Upon admission to Hospital Day 4, patient was placed on Bilevel Positive Airway Pressure (BiPAP) with inspiratory positive air pressure of 8 cmH<sub>2</sub>O and expiratory pressure of 4 cmH<sub>2</sub>O.

<sup>2</sup>Ceftolozane/tazobactam dose was reduced from 1500 mg q8h to 750 mg q8h due to interval development of transaminitis. (increase alanine aminotransferase, normal range 12-78 units/liter).

<sup>3</sup>Patient's ALT increased to 106 units/liter on Day 30 of treatment from baseline value of 51 units/liter on Day 23 and improved to baseline after dose reduction.
